# Supplementary material for: Deep functional measurements of Fragile X syndrome human neurons reveal multiparametric electrophysiological disease phenotype
Source: PubMed Central journal article supplement — Commun Biol. 2024 Nov 6;7:1447. doi: 10.1038/s42003-024-07120-6 (PMC11541539; doi:10.1038/s42003-024-07120-6), 2024-11-06
Supplement: 42003_2024_7120_MOESM2_ESM.pdf [file 42003_2024_7120_MOESM2_ESM.pdf]

## **Description of Additional Supplementary Files**

File name: Supplementary Data

Description: Supplementary Data provides the underlying data for all graphs in the manuscript and supp. figures. Each figure panel is broken out into a separate tab in the excel worksheet.
